# Supplementary material for: Redox Chemistry of Pt(II) Complex with Non-Innocent NHC Bis(Phenolate) Pincer Ligand: Electrochemical, Spectroscopic, and Computational Aspects
Source: MDPI journal article supplement (doi:10.3390/catal13091291), 2023-09-11
Supplement: s1 [file s1]

# Redox chemistry of Pt(II) complex with non-innocent NHC bis(phenolate) pincer ligand: electrochemical, spectroscopic and computational aspects

Ilya K. Mikhailov <sup>1,2</sup>, Zufar N. Gafurov <sup>1,\*</sup>, Alexey A. Kagilev <sup>1,2</sup>, Vladimir I. Morozov <sup>1</sup>, Artyom O. Kantyukov <sup>1,2</sup>, Ekaterina M. Zueva <sup>1,3</sup>, Gumar R. Ganeev <sup>2</sup>, Il'yas F. Sakhapov <sup>1</sup>, Asiya V. Toropchina <sup>1</sup>, Igor A. Litvinov <sup>1</sup>, Galina A. Gurina <sup>4</sup>, Alexander A. Trifonov <sup>4,5</sup>, Oleg G. Sinyashin <sup>1</sup>, and Dmitry G. Yakhvarov <sup>1,2,\*</sup>

<sup>1</sup> Arbuzov Institute of Organic and Physical Chemistry, FRC Kazan Scientific Center, Russian Academy of Sciences, Arbuzov Str. 8, Kazan, 420088, Russia; yakhvar@iopc.ru

<sup>2</sup> Kazan Federal University, Kremlovskaya Str. 18, Kazan, 420008, Russia

<sup>3</sup> Department of Inorganic Chemistry, Kazan National Research Technological University, Karl Marx Str. 68, Kazan, 420015, Russia

<sup>4</sup> Institute of Organometallic Chemistry of Russian Academy of Sciences, Tropinina str. 49, GSP-445, Nizhny Novgorod, 603950, Russia

<sup>5</sup> A.N. Nesmeyanov Institute of Organoelement Compounds, Russian Academy of Sciences (INEOS RAS), Vavilova Str. 28, Moscow, 119991, Russia

\* Correspondence: gafurov.zufar@iopc.ru (Z.N. Gafurov), yakhvar@iopc.ru (D.G. Yakhvarov).

## Supplementary Materials

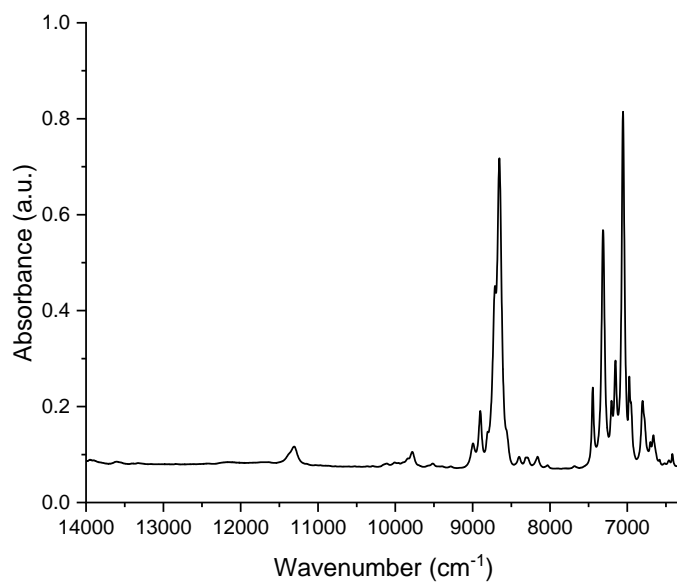

**Figure S1.** NIR spectrum of  $\text{CH}_2\text{Cl}_2$  at 298 K,  $l = 1$  cm.

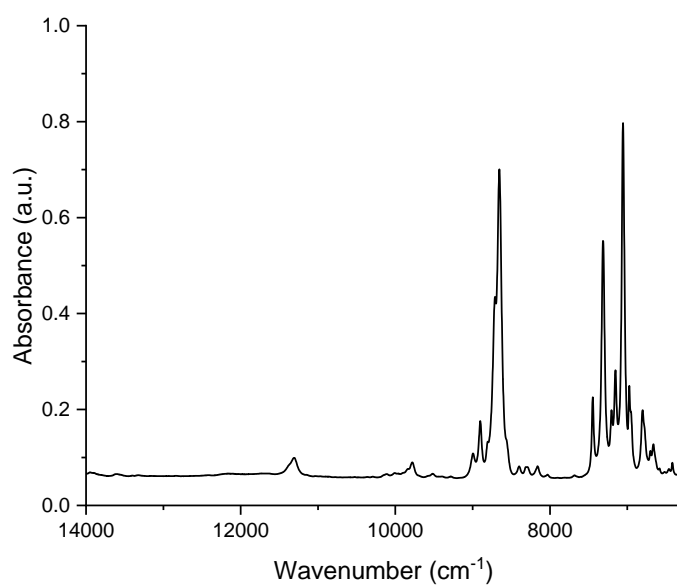

**Figure S2.** NIR spectrum of  $\text{Pt}(\text{L})\text{Py}$  ( $c = 0.1$  mM) in  $\text{CH}_2\text{Cl}_2$  at 298 K,  $l = 1$  cm.

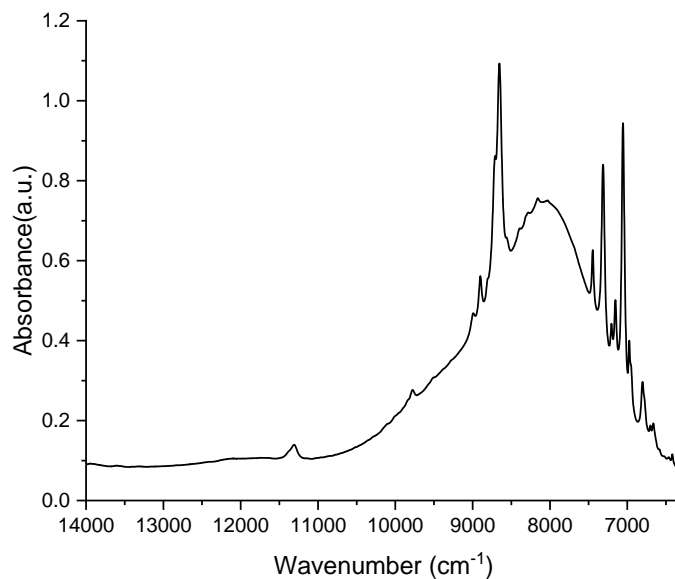

**Figure S3.** NIR spectrum of [Pt(L)Py][BF<sub>4</sub>] (*c* = 0.1 mM) in CH<sub>2</sub>Cl<sub>2</sub> at 298 K, *l* = 1 cm.

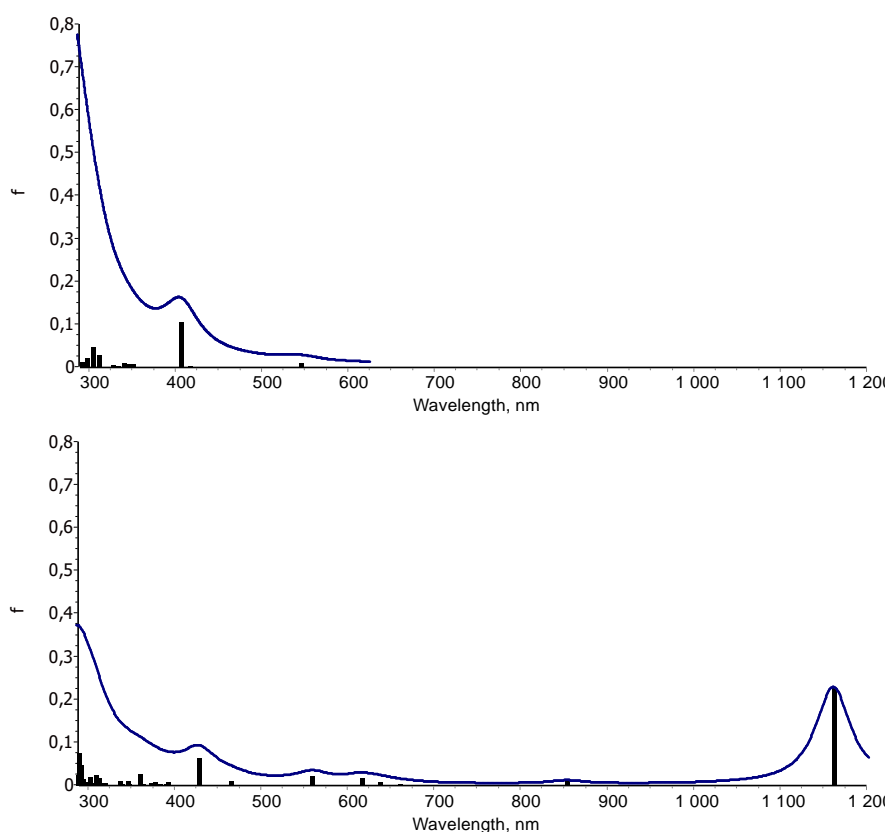

**Figure S4.** The calculated absorption spectra for Pt(L)Py (top graph) and [Pt(L)Py][BF<sub>4</sub>] (bottom graph). The vertical lines showing the position of electronic transitions and their intensity (*f* – oscillator strength) were broadened by the Lorentz function (f.w.h.m. = 50 nm).

**Table S1.** Selected TD-DFT-calculated excitation energies (absorption wavelengths), oscillator strengths, and main compositions of the most important electronic transitions for Pt(L)Py and [Pt(L)Py][BF<sub>4</sub>].

| $\lambda$                        | $f$  | Transition                                                                                                                                                                                                                                                                  |
|----------------------------------|------|-----------------------------------------------------------------------------------------------------------------------------------------------------------------------------------------------------------------------------------------------------------------------------|
| <b>Pt(L)Py</b>                   |      |                                                                                                                                                                                                                                                                             |
| 407                              | 0.10 | 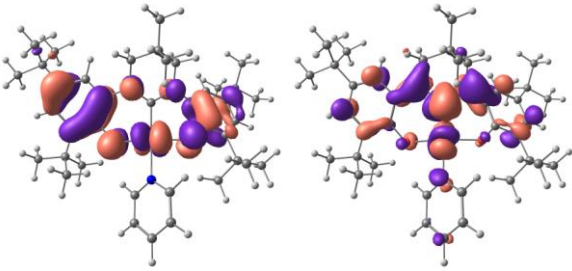 <p>HOMO <math>\rightarrow</math> LUMO+2 (95%, contour value = 0.03)</p>                                                                                                                  |
| <b>[Pt(L)Py][BF<sub>4</sub>]</b> |      |                                                                                                                                                                                                                                                                             |
| 1162                             | 0.23 |  <p><math>\beta</math>: HOMO <math>\rightarrow</math> LUMO (97%, contour value = 0.03)</p>                                                                                                |
| 429                              | 0.06 |  <p><math>\alpha</math>: HOMO <math>\rightarrow</math> LUMO (58%, contour value = 0.03)</p> <p><math>\alpha</math>: HOMO <math>\rightarrow</math> LUMO+1 (32%, contour value = 0.03)</p> |

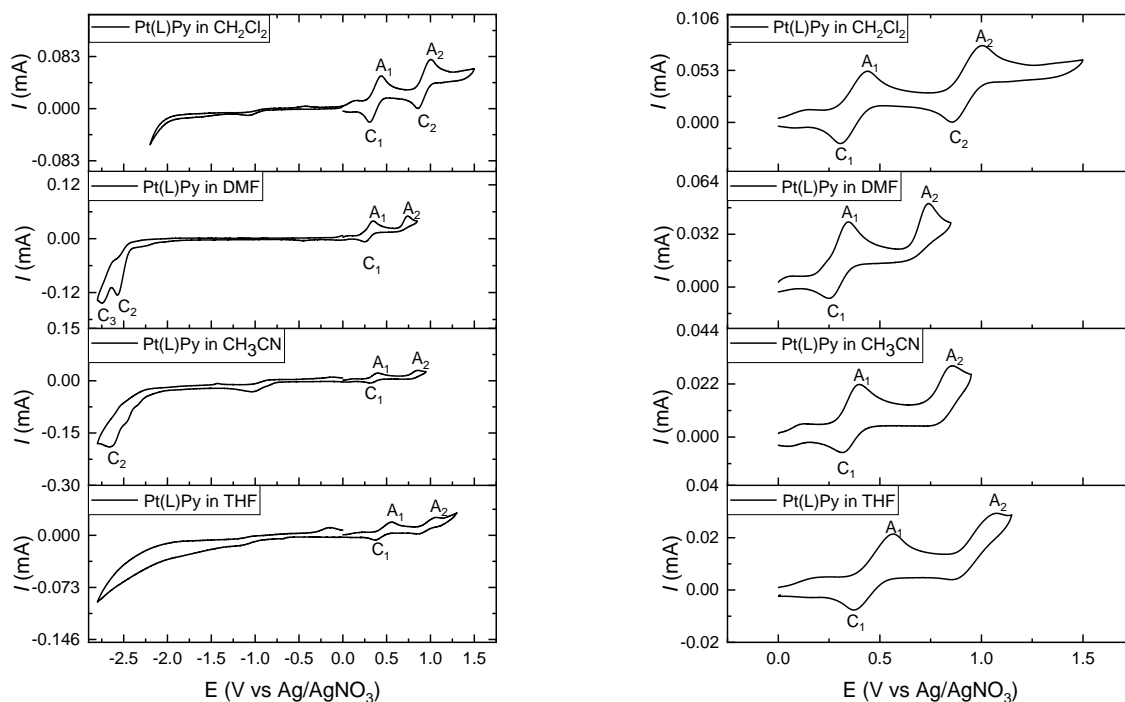

**Figure S5.** CV-curves recorded from a solution containing complex **Pt(L)Py** in different solvents ( $c = 5$  mM) in the presence of  $(n\text{-Bu}_4\text{N})\text{BF}_4$  (0.1 M) at the scan rate of  $100 \text{ mV}\cdot\text{s}^{-1}$  on the GC working electrode ( $T = 298 \text{ K}$ ).

**Table S2.** Peak potentials\* on the CV-curves of complex **Pt(L)Py** obtained in different solvents.

| Solvent                             | Cathodic peaks | $E_{\text{pred}}, \text{V}$ | Anodic peaks   | $E_{\text{p}^{\text{ox}}}, \text{V}$ |
|-------------------------------------|----------------|-----------------------------|----------------|--------------------------------------|
| <b>CH<sub>2</sub>Cl<sub>2</sub></b> | C <sub>1</sub> | +0.85                       | A <sub>1</sub> | +0.44                                |
|                                     | C <sub>2</sub> | +0.30                       | A <sub>2</sub> | +1.01                                |
| <b>DMF</b>                          | C <sub>1</sub> | +0.24                       | A <sub>1</sub> | +0.34                                |
|                                     | C <sub>2</sub> | -2.57                       | A <sub>2</sub> | +0.73                                |
|                                     | C <sub>3</sub> | -2.74                       |                |                                      |
| <b>CH<sub>3</sub>CN</b>             | C <sub>1</sub> | +0.32                       | A <sub>1</sub> | +0.40                                |
|                                     | C <sub>2</sub> | -2.65                       | A <sub>2</sub> | +0.85                                |
| <b>THF</b>                          | C <sub>1</sub> | +0.36                       | A <sub>1</sub> | +0.55                                |
|                                     |                |                             | A <sub>2</sub> | +1.07                                |

\* The mentioned potentials are referred to the Ag/AgNO<sub>3</sub>.

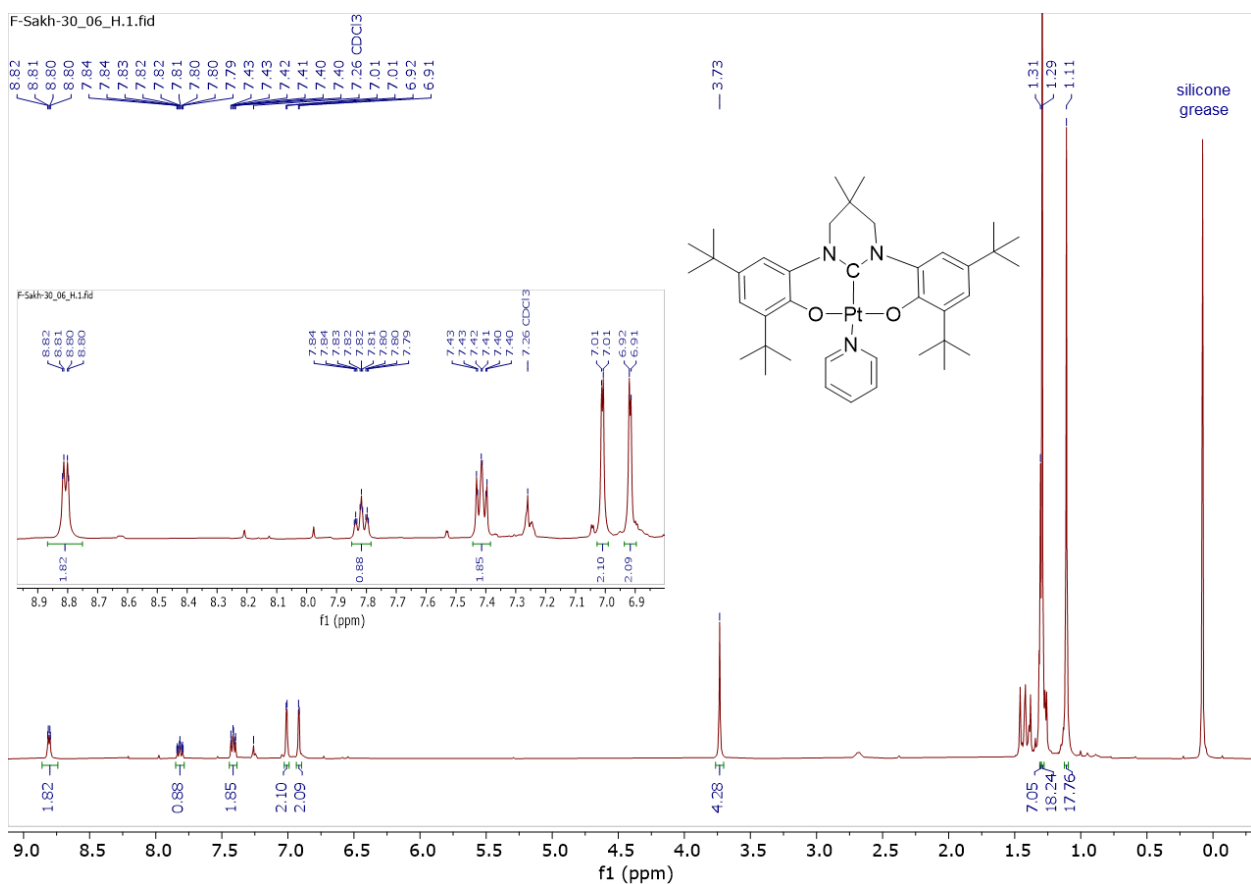

**Figure S6.** <sup>1</sup>H NMR (CDCl<sub>3</sub>, 400.17 MHz, 300 K) spectrum of **Pt(L)Py**.

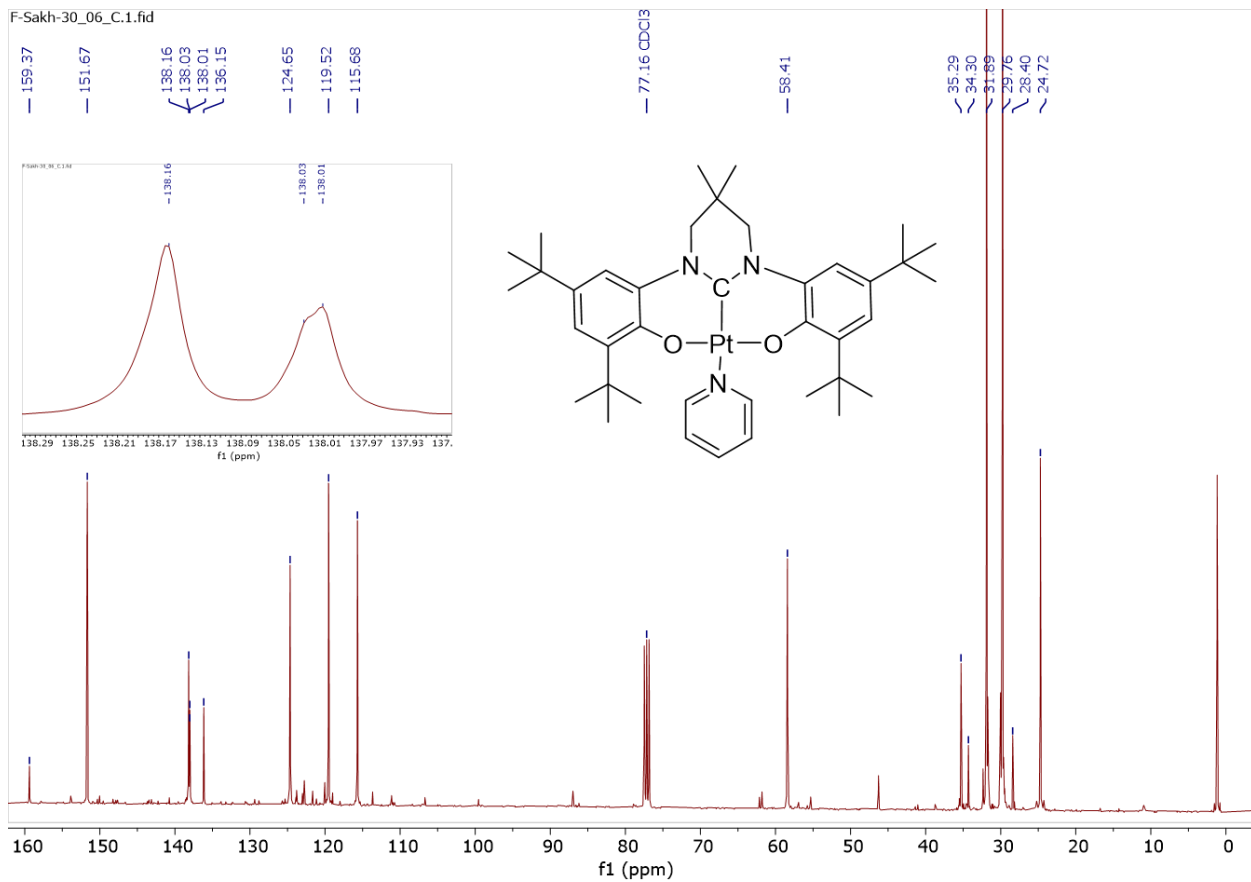

**Figure S7.** <sup>13</sup>C{<sup>1</sup>H}NMR (100.62 MHz, CDCl<sub>3</sub>, 300 K) spectrum of **Pt(L)Py**.
